# Supplementary material for: Shellac Gum/Carrageenan Alginate-Based Core–Shell Systems Containing Peppermint Essential Oil Formulated by Mixture Design Approach
Source: MDPI journal article supplement (doi:10.3390/gels7040162), 2021-10-03
Supplement: s1 [file s1]

# Shellac Gum/Carrageenan Alginate-Based Core–Shell Systems Containing Peppermint Essential Oil Formulated by Mixture Design Approach

Andrea Foglio Bonda <sup>1</sup>, Alessandro Candiani <sup>1</sup>, Martina Pertile <sup>1</sup>, Lorella Giovannelli <sup>1</sup> and Lorena Segale <sup>1,\*</sup>

<sup>1</sup> Department of Pharmaceutical Sciences, Università del Piemonte Orientale, Largo Donegani 2/3, 28100 Novara, Italy

\* Correspondence: lorena.segale@uniupo.it; tel. 0039 0321 375862.

## 4. Materials and Methods

### 2.4. Morphology and dimensions

## Supplementary Tables

**Table S1.** TModels and corresponding equation used in the statistical analysis.

| Model         | Equation                                                                                                                                 |
|---------------|------------------------------------------------------------------------------------------------------------------------------------------|
| Linear        | $Variable = b_1ALG + b_2CGR + b_3SHL$                                                                                                    |
| Special Cubic | $Variable = b_1ALG + b_2CGR + b_3SHL + b_{12}ALG \cdot CRG + b_{13}ALG \cdot SHL + b_{23}CRG \cdot SHL + b_{123}ALG \cdot CRG \cdot SHL$ |
| Quadratic     | $Variable = b_1ALG + b_2CGR + b_3SHL + b_{12}ALG \cdot CRG + b_{13}ALG \cdot SHL + b_{23}CRG \cdot SHL$                                  |

**Table S2.** Coefficients calculated for each significative model.

| Equation Coefficient | Variable |        |              |                 |           |
|----------------------|----------|--------|--------------|-----------------|-----------|
|                      | SF Wet   | SF DRY | Diameter dry | Weight unit dry | Swelling  |
| b1                   | 0.7791   | 0.7958 | 1.76         | 2.61            | 33.99     |
| b2                   | 0.6863   | 0.6759 | 1.91         | 7.89            | 3,627.48  |
| b3                   | 0.8887   | 0.8278 | 1.83         | 5.25            | 95.03     |
| b12                  | n.a.     | n.a.   | 0.2760       | -7.02           | -4,367.59 |
| b13                  | n.a.     | n.a.   | - 0.2461     | -4.43           | -204.78   |
| b23                  | n.a.     | n.a.   | 4.90         | 1.72            | -3,873.42 |
| b123                 | n.a.     | n.a.   | -8.03        | n.a.            | n.a.      |

## Supplementary Figures

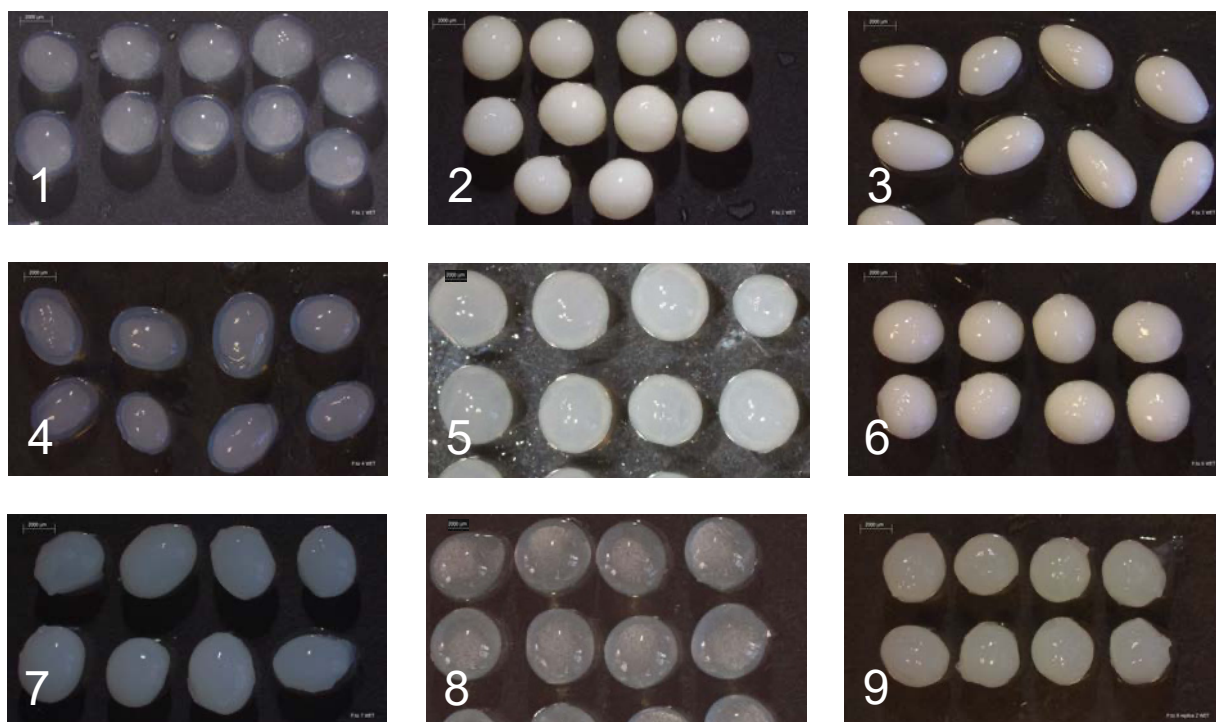

**Figure S1.** Detailed images of the wet core-shell systems (numbers correspond to the Experimental Points).

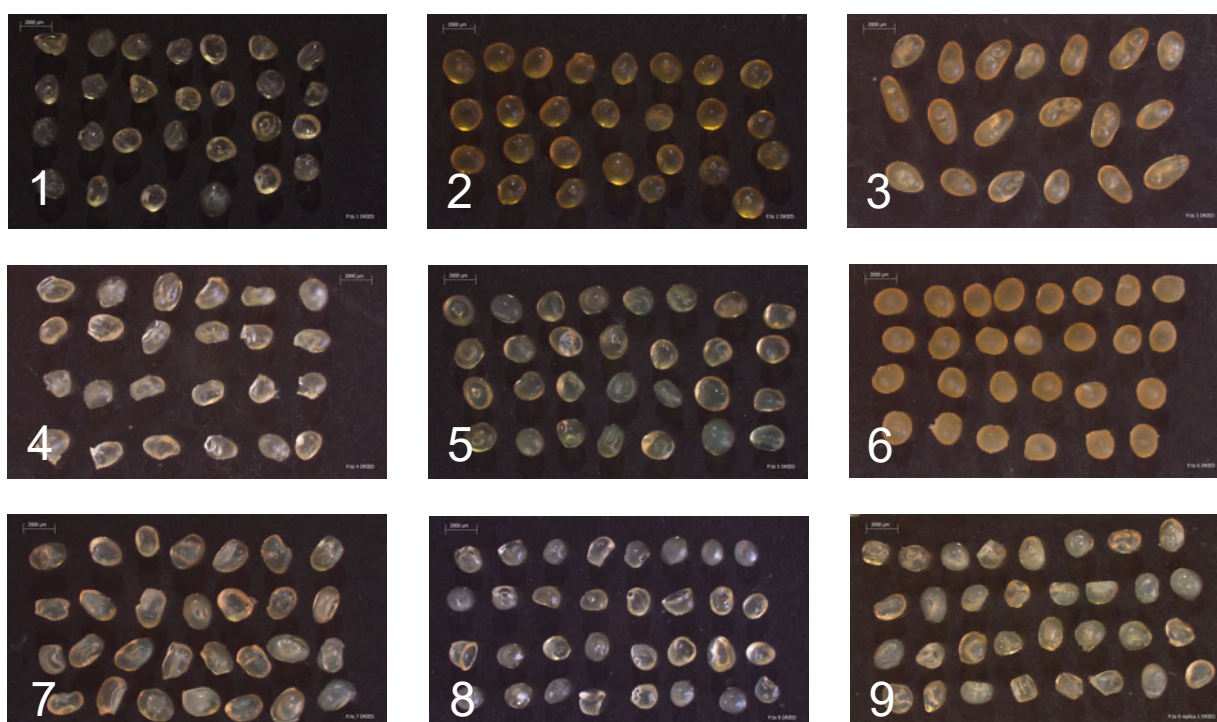

**Figure S2.** Detailed images of the dried core-shell systems (numbers correspond to the Experimental Points).
